# Supplementary material
Source: PubMed Central journal article supplement (PMC4431926)

### **Supplemental Figure Legends**

Supplemental Figure 1. Kaplan-Meier survival curves for patients with Ewing sarcoma treated with neoadjuvant chemotherapy and R0 resection. At 5 years after surgery, the local control, distant control, progression-free survival, and overall survival rates were 78%, 69%, 58%, and 65%, respectively. Thin lines denote 95% confidence intervals.

Supplemental Figure 2. Kaplan-Meier curves for patients with Ewing sarcoma treated with neoadjuvant chemotherapy and R0 resection showing post-recurrence survival for all recurrences (A) and then stratified by recurrence less than 1 year after surgery (B), followed by post-local failure survival (C). Thin lines denote 95% confidence intervals.

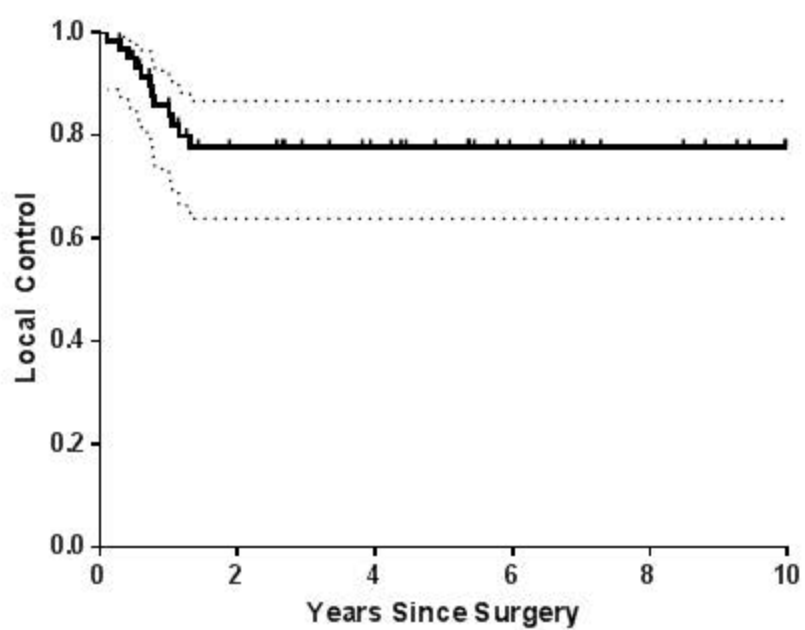

At risk 61 43 34 30 27 23 17 14 12 10 6

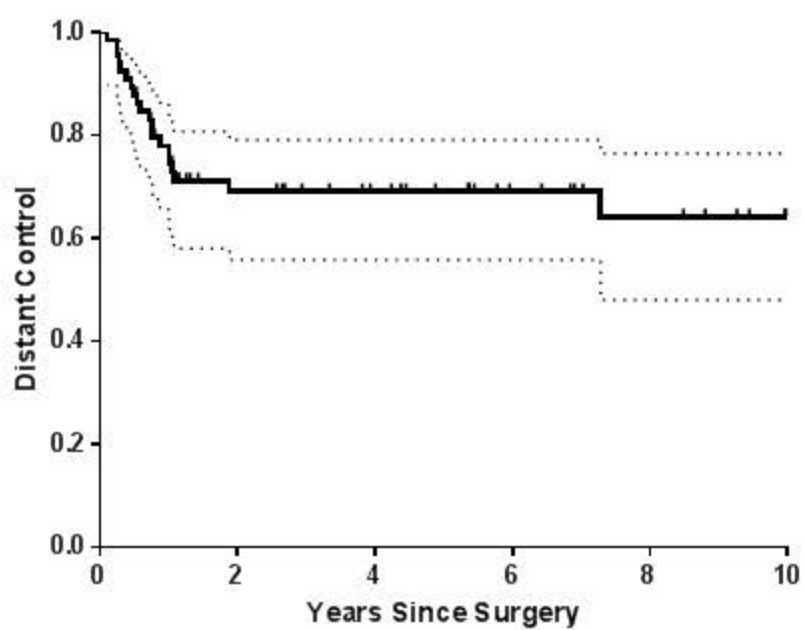

At risk 66 44 35 31 28 24 18 15 13 11 6

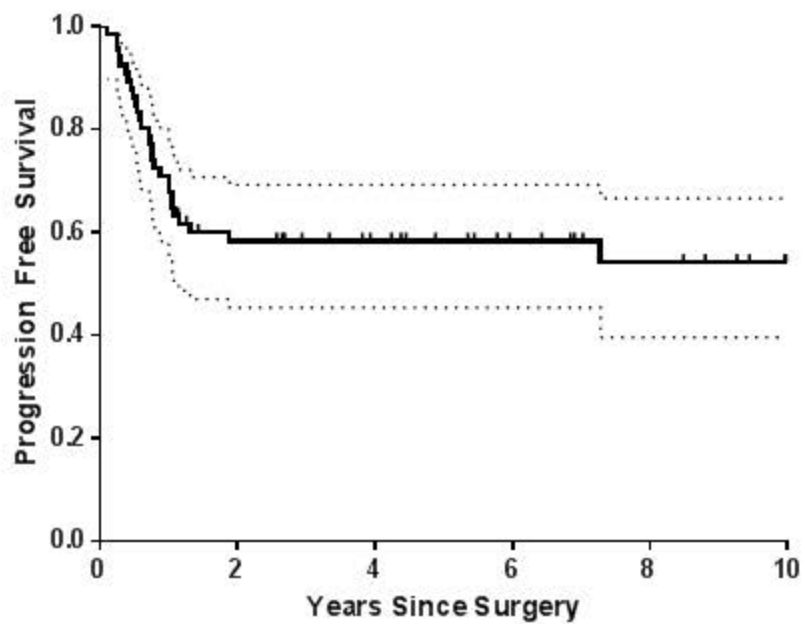

At risk 66 44 35 31 28 24 18 15 13 11 6

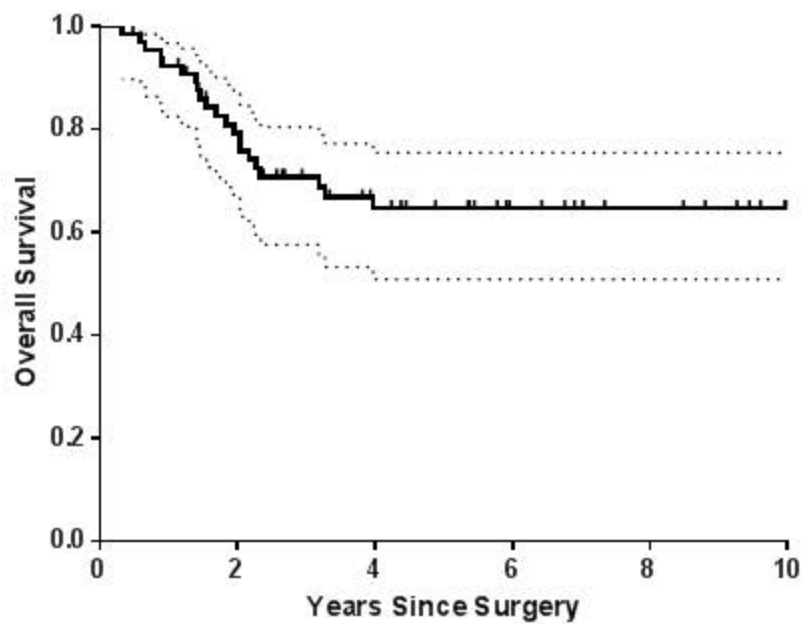

At risk 66 60 47 36 30 26 19 16 14 12 7

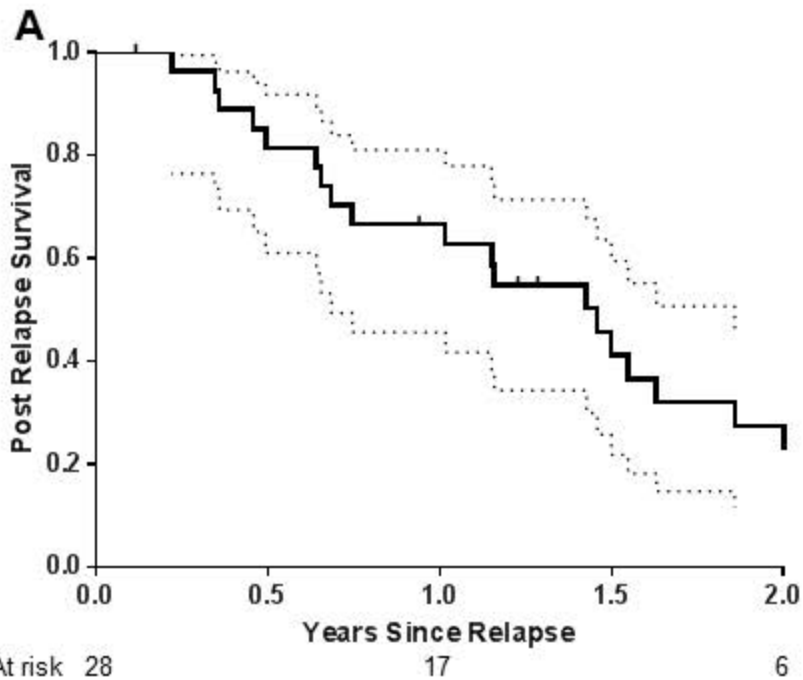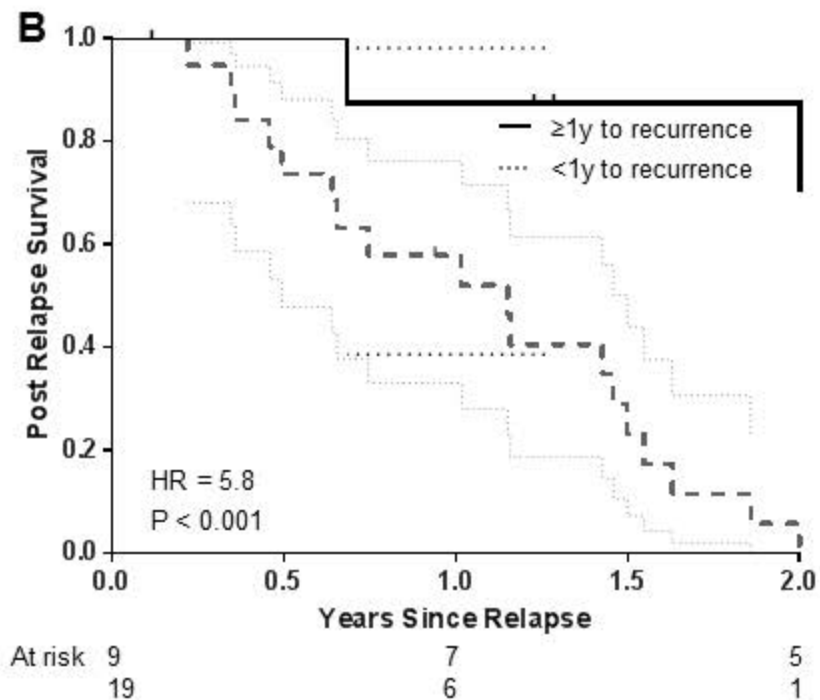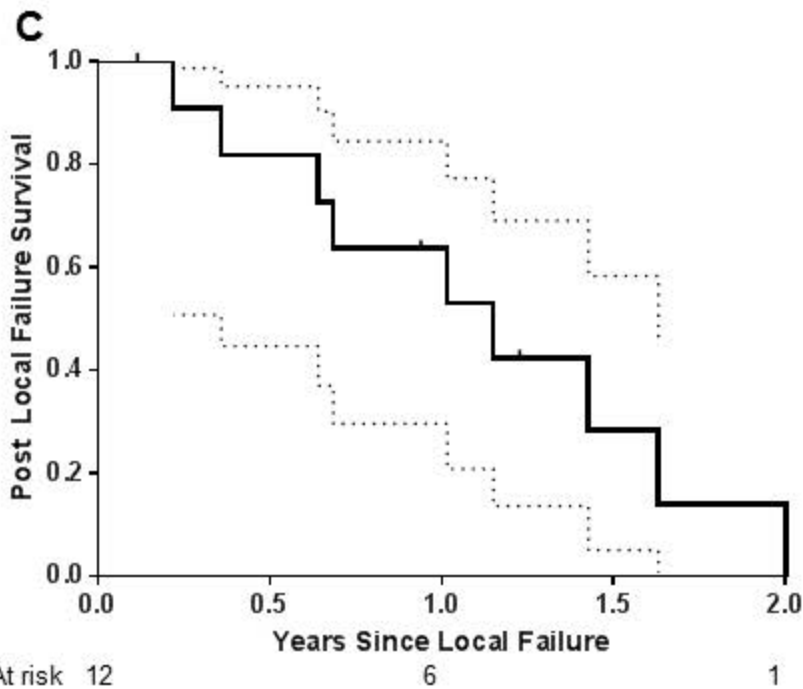

Supplement: NIHMS657985-supplement.pdf [file NIHMS657985-supplement.pdf]
